# Supplementary material for: &ldquo;Out of the Can&rdquo;: A Draft Genome Assembly, Liver Transcriptome and Nutrigenomics of the European Sardine, <em>Sardina p</em><em>ilchardus</em>
Source: Preprints.org preprint supplement (doi:10.20944/preprints201809.0169.v1), 2018-09-10
Supplement: Supplementary file 1 [file Additional File 2.xls]

## Sheet: Additional Table 1
Additional Table 1. MixS descriptors and acession numbers of tissue samples, raw data and assemblies of Sardina pilchardus
Item	Description
investigation_type	Eukaryote
project_name	Genome and Liver transcriptome of Sardine
lat_lon	41.501944 N 8.851667W
geo_loc_name	Atlantic Ocean
tissues	Muscle and Liver
collection_date	2017-06-22
biome	Sea water (ENVO:00002149)
feature	Ocean (ENVO:00000015)
material	Sea water (ENVO:00002149)
env_package	Water
seq_meth	Illumina HiSeq
Collector	Mónica Felício
Maturity	Adult
Datasets Generated	Acession Numbers of NCBI
Transcriptome raw data	SRR6505116
Genome raw data	SRR7535145
Transcriptome Assembly	GGSC00000000
Genome Assembly	QPKT00000000
Mitocondrial Assembly	MH329246
Fucntional Assays - Fads2	MH595718
Fucntional Assays - Elovl2	MH595719
Fucntional Assays - Elovl5	MH595720

## Sheet: Additional Table 2
Additional Table 2. GenomeScope profile statistics for Sardina pilchardus WGS reads estimated using k-mer 21, 25, and 31.
	k = 21		k = 25		k = 31
Property	min	max	min	max	min	max
Heterozygosity (%)	1.73125	1.74658	1.69125	1.70096	1.59844	1.60462
Genome Haploid Length (bp)	625 265 805	626 942 307	633 310 003	634 516 106	635 933 438	636 993 076
Genome Repeat Length (bp)	93 731 192	93 982 510	90 628 401	90 800 998	91 522 092	91 674 593
Genome Unique Length (bp)	531 534 612	532 959 797	542 681 602	543 715 108	544 411 346	545 318 483
Model Fit (%)	95.8008	97.6997	96.7742	98.5977	97.4516	99.2454
Read Error Rate (%)	0.0741011	0.0741011	0.0854307	0.0854307	0.106028	0.106028
kmer 21 report: http://genomescope.org/analysis.php?code=FBVcY8QyLpByhWWeQjoQ
kmer 25 report: http://genomescope.org/analysis.php?code=2uJrNFJyNRXFiBpwx8Zz
kmer 31 report: http://genomescope.org/analysis.php?code=Ps5dzAWddBF2tExmtZzf

## Sheet: Additional Table 3
Additional Table 3. Completeness assessment of sardine genome using the liver transcriptome.
Blat Mapping Rate	Number of transcripts	Total Bases covered by genome assembly, %	Sequences covered by genome assembly, %	% of transcripts mapped to single scaffold
Contigs >200nn	236,766 / 245,053	89.2	96.618	65.651
Contigs >500nn	236,766 / 245,053	89.199	96.618	65.648
Contigs >1000nn	236,761 / 245,053	89.196	96.616	65.631

## Sheet: Additional Table 4
Additional Table 4. List of species and GenBank references used in the mtDNA phylogeny.
Taxon	Accession Number
Sardina pilchardus	NC_009592.1; MH329246
Clupea harengus	NC_009577.1
Alosa alosa	NC_009575.1
Scomber colias	NC_013724.1
Danio rerio	NC_002333.2
Tetraodon nigroviridis	DQ019313.1
Takifugu rubripes	NC_004299.1
Lepisosteus oculatus	NC_004744.1
Petromyzon marinus	NC_001626.1
Xiphophorus maculatus	NC_011379.1
Latimeria chalumnae	NC_001804.1
Oreochromis niloticus	NC_013663.1
Gasterosteus wheatlandi*	NC_011570.1
Astyanax mexicanus	AP011982.1
Oryzias latipes	NC_004387.1
Gadus morhua	NC_002081.1
Poecilia formosa	NC_027949.1
*Gasterosteus aculeatus does not have a mtDNA genome sequence publicly available. The Gasterosteus wheatlandi mtDNA genome sequence was used.

## Sheet: Additional Table 5
Additional Table 5. Blast-n output of Clupea harengus sequences against the Sardine genome. These values were used to reconstruct the synteny of the locus for each one of the three genes target Fads2, Elovl2 and Elovl5.
Accession Number in Clupea Harengus	Gene Symbol	Scaffolds of Sardine Genome	ID%	Exon number	Length	Gaps	qstart	qend	sstart	send	E-valeu	Bitscore	Strand
XM_012816175.1	gcm2	scf7180014826570	91.000	1	100	6	1	97	94068	94167	1.44e-28	132	-
XM_012816175.1	gcm2	scf7180014826570	90.625	2	256	22	95	349	94494	94748	7.9e-91	339	-
XM_012816175.1	gcm2	scf7180014826570	85.714	3	112	16	352	463	95792	95903	1.12e-24	119	-
XM_012816175.1	gcm2	scf7180014826570	93.023	4	129	9	460	588	96489	96617	8.42e-46	189	-
XM_012816175.1	gcm2	scf7180014826570	86.475	5	902	95	587	1467	97720	98615	0	965	-
XM_012816110.1	sycp2l	scf7180014826570	100.000	1	102	0	1	102	89318	89217	9.09e-46	189	-
XM_012816110.1	sycp2l	scf7180014826570	100.000	2	93	0	103	195	88352	88260	9.15e-41	172	-
XM_012816110.1	sycp2l	scf7180014826570	100.000	3	63	0	194	256	87964	87902	4.35e-24	117	-
XM_012816110.1	sycp2l	scf7180014826570	99.375	4	160	1	253	412	87762	87603	2.42e-76	291	-
XM_012816110.1	sycp2l	scf7180014826570	100.000	5	67	0	409	475	86678	86612	2.60e-26	124	-
XM_012816110.1	sycp2l	scf7180014826570	100.000	6	37	0	473	509	86443	86407	1.24e-09	69.4	-
XM_012816110.1	sycp2l	scf7180014826570	100.000	7	30	0	508	537	86153	86124	9.62e-06	56.5	-
XM_012816110.1	sycp2l	scf7180014826570	96.774	8	31	1	536	566	86020	85990	1.24e-04	52.8	-
XM_012816110.1	sycp2l	scf7180014826570	100.000	9	61	0	567	627	85854	85794	5.63e-23	113	-
XM_012816110.1	sycp2l	scf7180014826570	100.000	10	141	0	626	766	84547	84407	1.90e-67	261	-
XM_012816110.1	sycp2l	scf7180014826570	100.000	11	49	0	766	814	83368	83320	2.64e-16	91.6	-
XM_012816110.1	sycp2l	scf7180014826570	100.000	12	103	0	812	914	82590	82488	2.53e-46	191	-
XM_012816110.1	sycp2l	scf7180014826570	100.000	13	70	0	913	982	82171	82102	5.59e-28	130	-
XM_012816110.1	sycp2l	scf7180014826570	100.000	14	63	0	980	1042	81985	81923	4.35e-24	117	-
XM_012816110.1	sycp2l	scf7180014826570	100.000	15	99	0	1037	1135	81823	81725	4.23e-44	183	-
XM_012816110.1	sycp2l	scf7180014826570	99.091	16	110	1	1134	1243	80457	80348	1.51e-48	198	-
XM_012816110.1	sycp2l	scf7180014826570	100.000	17	96	0	1240	1335	79852	79757	1.97e-42	178	-
XM_012816110.1	sycp2l	scf7180014826570	100.000	18	101	0	1334	1434	79024	78924	3.27e-45	187	-
XM_012816110.1	sycp2l	scf7180014826570	100.000	19	60	0	1434	1493	77251	77192	2.02e-22	111	-
XM_012816110.1	sycp2l	scf7180014826570	98.361	20	61	1	1492	1552	76786	76726	2.62e-21	108	-
XM_012816110.1	sycp2l	scf7180014826570	97.059	21	34	1	1548	1581	75393	75360	2.67e-06	58.4	-
XM_012816111.1	elovl2	scf7180014826570	100.000	1	90	0	1	90	67597	67686	1.91e-39	167	+
XM_012816111.1	elovl2	scf7180014826570	100.000	2	83	0	89	171	71336	71418	1.48e-35	154	+
XM_012816111.1	elovl2	scf7180014826570	98.286	3	175	3	168	342	71842	72016	1.08e-81	307	+
XM_012816111.1	elovl2	scf7180014826570	97.778	4	135	2	338	472	72349	72482	6.67e-59	231	+
XM_012816111.1	elovl2	scf7180014826570	100.000	5	136	0	465	600	72846	72981	5.12e-65	252	+
XM_012816111.1	elovl2	scf7180014826570	100.000	6	128	0	596	723	73981	74108	1.43e-60	237	+
XM_012816256.1	gnal	scf7180014826570	100.000	1	449	0	1	449	59477	59029	0.0	830	-
XM_012816256.1	gnal	scf7180014826570	98.718	2	78	1	448	525	48838	48761	8.49e-31	139	-
XM_012816256.1	gnal	scf7180014826570	95.522	3	67	1	511	576	47691	47626	8.61e-21	106	-
XM_012816256.1	gnal	scf7180014826570	100.000	4	122	0	576	697	47434	47313	6.34e-57	226	-
XM_012816256.1	gnal	scf7180014826570	99.048	5	105	1	690	794	36156	36052	8.31e-46	189	-
XM_012816256.1	gnal	scf7180014826570	100.000	6	56	0	795	850	19746	19691	3.10e-20	104	-
XM_012816256.1	gnal	scf7180014826570	100.000	7	77	0	847	923	19398	19322	6.57e-32	143	-
XM_012816256.1	gnal	scf7180014826570	95.714	8	70	1	918	985	18411	18342	1.85e-22	111	-
XM_012816256.1	gnal	scf7180014826570	99.219	9	128	1	982	1109	16862	16735	1.36e-58	231	-
XM_012816256.1	gnal	scf7180014826570	100.000	10	134	0	1101	1234	16457	16324	1.35e-63	248	-
XM_012816256.1	gnal	scf7180014826570	100.000	11	69	0	1234	1302	14980	14912	1.84e-27	128	-
XM_012816256.1	gnal	scf7180014826570	100.000	12	148	0	1302	1449	14365	14218	2.23e-71	274	-
XM_012816176.1	mppe1	scf7180014826570	87.727	1	220	27	12	231	1278	1497	1.77e-66	257	+
XM_012816176.1	mppe1	scf7180014826570	87.500	2	112	14	232	343	2307	2418	4.03e-28	130	+
XM_012816176.1	mppe1	scf7180014826570	86.486	3	111	14	341	451	3063	3172	2.43e-25	121	+
XM_012816176.1	mppe1	scf7180014826570	85.714	4	77	11	448	524	3549	3625	1.15e-13	82.4	+
XM_012816176.1	mppe1	scf7180014826570	83.495	5	103	17	528	630	4088	4190	4.09e-18	97.1	+
XM_012816176.1	mppe1	scf7180014826570	81.333	6	75	14	631	705	6015	6089	1.49e-07	62.1	+
XM_012816176.1	mppe1	scf7180014826570	88.971	7	136	14	703	838	6561	6695	3.07e-39	167	+
XM_012816176.1	mppe1	scf7180014826570	91.608	8	143	12	828	970	7469	7611	1.09e-48	198	+
XM_012816176.1	mppe1	scf7180014826570	85.549	9	173	25	977	1149	8687	8859	1.1e-43	182	+
XM_012832081.1	eps8l2	scf7180014821886	100.000	1	163	0	1	163	3755	3917	1.32e-79	302	+
XM_012832081.1	eps8l2	scf7180014821886	100.000	2	152	0	162	313	8580	8731	1.72e-73	281	+
XM_012832081.1	eps8l2	scf7180014821886	98.837	3	86	1	308	393	9172	9257	3.91e-35	154	+
XM_012832081.1	eps8l2	scf7180014821886	100.000	4	107	0	393	499	9472	9578	1.78e-48	198	+
XM_012832081.1	eps8l2	scf7180014809123	100.000	5	73	0	498	570	10403	10331	1.42e-29	135	-
XM_012832081.1	eps8l2	scf7180014809123	100.000	6	128	0	570	697	10107	9980	3.77e-60	237	-
XM_012832081.1	eps8l2	scf7180014809123	100.000	7	91	0	697	787	9543	9453	1.40e-39	169	-
XM_012832081.1	eps8l2	scf7180014809123	98.734	8	79	1	786	864	8707	8629	3.04e-31	141	-
XM_012832081.1	eps8l2	scf7180014809123	100.000	9	150	0	861	1010	8332	8183	2.22e-72	278	-
XM_012832081.1	eps8l2	scf7180014809123	100.000	10	156	0	1009	1164	7718	7563	1.03e-75	289	-
XM_012832081.1	eps8l2	scf7180014809123	97.619	11	42	1	1160	1201	7194	7153	1.13e-10	73.1	-
XM_012832081.1	eps8l2	scf7180014809123	100.000	12	94	0	1196	1289	6699	6606	3.00e-41	174	-
XM_012832081.1	eps8l2	scf7180014809123	100.000	13	134	0	1286	1419	6354	6221	1.74e-63	248	-
XM_012832081.1	eps8l2	scf7180014809123	98.387	14	62	0	1416	1477	6028	5968	3.08e-21	108	-
XM_012832081.1	eps8l2	scf7180014809123	100.000	15	171	0	1477	1647	5849	5679	4.71e-84	316	-
XM_012832081.1	eps8l2	scf7180014809123	97.222	16	36	1	1610	1645	5621	5586	2.44e-07	62.1	-
XM_012832081.1	eps8l2	scf7180014809123	100.000	17	133	0	1648	1780	5003	4871	6.27e-63	246	-
XM_012832081.1	eps8l2	scf7180014809123	100.000	18	80	0	1779	1858	4268	4189	1.82e-33	148	-
XM_012832087.1	fads2	scf7180014798914	100.000	1	211	0	1	211	5720	5510	1.96e-106	390	+
XM_012832087.1	fads2	scf7180014798914	100.000	2	113	0	210	322	5281	5169	5.88e-52	209	+
XM_012832087.1	fads2	scf7180014798914	100.000	3	200	0	320	519	4855	4656	2.55e-100	370	+
XM_012832087.1	fads2	scf7180014798914	99.091	4	110	0	517	625	3762	3653	4.58e-48	196	+
XM_012832087.1	fads2	scf7180014798914	98.529	5	136	1	620	754	2875	2740	7.50e-61	239	+
XM_012832087.1	fads2	scf7180014798914	100.000	6	63	0	746	808	1734	1672	3.67e-24	117	+
XM_012832087.1	fads2	scf7180014798914	100.000	7	78	0	809	886	1542	1465	1.68e-32	145	+
XM_012832087.1	fads2	scf7180014798914	100.000	8	102	0	885	986	1017	916	7.66e-46	189	+
XM_012832087.1	fads2	scf7180014809123	100.000	9	54	0	1285	1338	1800	1853	3.69e-19	100	-
XM_012832082.1	lrrc10b	scf7180014798914	100.000	1	658	0	1	658	14061	14718	0.0	1216	+
XM_012832082.1	lrrc10b	scf7180014798914	99.836	2	609	0	653	1260	21010	21618	0.0	1118	+
XM_012840430.1	klhl31	scf7180014815187	89.277	1	1175	126	1	1175	12265	11091	0.0	1472	-
XM_012840430.1	klhl31	scf7180014815187	89.524	2	735	77	1173	1907	10939	10205	0.0	931	-
XM_012840439.1	gclc	scf7180014815187	100.000	1	152	0	1	152	6262	6111	1.75e-73	281	-
XM_012840439.1	gclc	scf7180014815187	100.000	2	115	0	149	263	4751	4637	6.48e-53	213	-
XM_012840439.1	gclc	scf7180014815187	100.000	3	185	0	264	448	3449	3265	7.92e-92	342	-
XM_012840439.1	gclc	scf7180014815187	100.000	4	116	0	445	560	1540	1425	1.80e-53	215	-
XM_012840439.1	gclc	scf7180014815187	98.485	5	66	0	555	619	1044	979	1.88e-23	115	-
XM_012840439.1	gclc	scf7180014815187	100.000	6	139	0	620	758	790	652	2.95e-66	257	-
XM_012840439.1	gclc	scf7180014815187	100.000	7	80	0	754	833	568	489	1.85e-33	148	-
XM_012840439.1	gclc	scf7180014798588	100.000	8	112	0	1289	1400	55	166	3.01e-51	207	-
XM_012840439.1	gclc	scf7180014798588	100.000	9	85	0	1397	1481	261	345	3.08e-36	158	-
XM_012840439.1	gclc	scf7180014798588	100.000	10	113	0	1479	1591	1484	1596	8.38e-52	209	-
XM_012840439.1	gclc	scf7180014798588	100.000	11	124	0	1589	1712	2252	2375	6.43e-58	230	-
XM_012840439.1	gclc	scf7180014798588	100.000	12	185	0	1709	1893	2507	2691	7.92e-92	342	-
XM_012840381.1	elovl5	scf7180014798588	99.588	1	243	1	1	243	7014	7256	9.67e-123	444	-
XM_012840381.1	elovl5	scf7180014802726	97.500	2	80	2	242	321	659	738	1.84e-30	137	-
XM_012840381.1	elovl5	scf7180014802726	100.000	3	174	0	320	493	1054	1227	4.73e-86	322	-
XM_012840381.1	elovl5	scf7180014802726	100.000	4	125	0	494	618	2782	2906	8.19e-59	231	-
XM_012840381.1	elovl5	scf7180014802726	100.000	5	136	0	618	753	3484	3619	6.29e-65	252	-
XM_012840381.1	elovl5	scf7180014802726	100.000	6	131	0	752	882	3801	3931	3.78e-62	243	-
XM_012840438.1	fbxo9	scf7180014808948	83.544	1	79	13	3	81	3815	3737	2.11e-11	75.0	+
XM_012840438.1	fbxo9	scf7180014808948	80.916	2	131	25	79	209	3200	3070	2.69e-20	104	+
XM_012840438.1	fbxo9	scf7180014808948	93.878	3	49	3	220	268	2843	2795	2.11e-11	75.0	+
XM_012840438.1	fbxo9	scf7180014808948	90.196	4	102	10	267	368	2694	2593	3.43e-29	134	+
XM_012840438.1	fbxo9	scf7180014808948	86.260	5	131	18	369	499	2357	2227	5.69e-32	143	+
XM_012840438.1	fbxo9	scf7180014808948	90.265	6	113	11	503	615	955	843	1.22e-33	148	+
XM_012840438.1	fbxo9	scf7180014808948	89.344	7	122	13	613	734	513	392	2.63e-35	154	+
XM_012840438.1	fbxo9	scf7180014808948	86.957	8	92	12	736	827	165	74	2.69e-20	104	+
XM_012840438.1	fbxo9	scf7180014807819	91.667	9	96	8	919	1014	10888	10983	3.43e-29	134	+
XM_012840438.1	fbxo9	scf7180014807819	91.367	10	139	12	1013	1151	11089	11227	2.00e-46	191	+
XM_012840438.1	fbxo9	scf7180014807819	90.991	11	111	10	1150	1260	11930	12040	3.40e-34	150	+

## Sheet: Additional Table 6
Additional Table 6. Top results from a reciprocal blast-p search of the 5 proteins flanking the genomic locations of Fads2, Elovl2 and Eelovl2 in herring and the sardine genomes. The 5 sardine proteins were confirmed to be the orthologs of the 5 herring proteins.
Gene	Herring reference protein query	Sardine protein database	%id	length	mismatch	gap open	query start	query end	subject start	subject end	e-value	bits core
lrrc10b	XP_012687536.1	DN31746_c0_g1_i1.p1	86.04	308	38	2	3	310	22	324	2e-174	483
sycp2l	XP_012671564.1	DN46554_c2_g1_i4.p1	70.3	468	126	6	89	552	1	459	0	623
eps8l2	XP_012687535.1	DN46721_c1_g1_i5.p1	83.96	424	64	4	9	430	45	466	0	747
gnal	XP_012671710.1	DN47118_c3_g2_i1.p1	94.5	473	26	0	1	473	1	473	0	887
gclc	XP_012695893.1	DN48977_c0_g2_i2.p1	97.7	564	13	0	1	564	1	564	0	1155
Gene	Sardine reference protein query	Herring protein database	%id	length	mismatch	gap open	query start	query end	subject start	subject end	e-value	bit score
lrrc10b	DN31746_c0_g1_i1.p1	XP_012687536.1	88.67	300	30	1	20	315	1	300	3e-179	495
sycp2l	DN46554_c2_g1_i4.p1	XP_012671564.1	69.85	481	130	7	1	472	89	563	0	628
eps8l2	DN46721_c1_g1_i5.p1	XP_012687535.1	83.96	424	64	4	45	466	9	430	0	747
gnal	DN47118_c3_g2_i1.p1	XP_012671710.1	94.5	473	26	0	1	473	1	473	0	886
gclc	DN48977_c0_g2_i2.p1	XP_012695893.1	97.7	564	13	0	1	564	1	564	0	1155

## Sheet: Additional Table 7
Additional Table 7. Primer sequences and PCR conditions used to isolate Fads2, Elovl2 and Elovl5 genes.
Gene	Primer name	Primer sequence	TM	Extension (size bp)	Cycles
Fads2	SPI_FADS2_pYes_BAMHI_F	CCCGGATCCAAGATGGGCCGCGGAGGTC	62 °C	24	40
	SPI_FADS2_pYes_XBAI_R	CCCTCTAGAGTCACTTGTGCAGGTACGCAT
Elovl2	SPI_El2_pYes_KPNI_F	CCCGGTACC AACATGAGTTACATCAGCACACTAG	62 °C	14	35
	SPI_EL2_pYes_ECORI_R	CCCGAATTCTCACTTGACTTTTTGCTTTGTCGTG
Elovl5	SPI_EL5_Pyes_BAMHI_F2	CCCGGATCCAGAATGGAGACATTCAACCATAATC	62 °C	15	35
	SPI_EL5pYES_XBAI_R	CCCTCTAGAGTCAATCAGCCCTCAGTTTCCT

## Sheet: Additional Tables 8&9&10
Additional Table 8. Functional characterization of Sardina pilchardus fads2 (FA, fatty acid; Nd, not detected).
		Fads2
FA Substrate	FA Product	Conversion %	Activity
18:2n–6	18:3n–6	7,4	Δ6
18:3n–3	18:4n–3	19,6	Δ6
20:2n–6	20:3n–6	0,4	Δ8
20:3n–3	20:4n–3	1,6	Δ8
20:3n–6	20:4n–6	Nd	Δ5
20:4n–3	20:5n–3	Nd	Δ5
22:4n–6	22:5n–6	Nd	Δ4
22:5n–3	22:6n–3	Nd	Δ4
Additional Table 9. Sardina pichardus Fads2+Zebrafish Elovl2 co-expression
Name	Substrate	Product	Area substrate	Area product	Conversion
	18:3n–3	18:4n–3	24,1	3,54	12,8
	24:5n–3	24:6n–3	5,25	0,33	5,9
Additional Table 10. Functional characterization of Sardina pilchardus elovl2 and elovl5 (FA, fatty acid; Nd, not detected)
		Elovl2	Elovl5
FA Substrate	FA Product	Conversion %		Activity
18:2n–6	20:2n–6	2,6	25,4	C18->C20
18:3n–3	20:3n–3	6,3	30,8
18:3n–6	20:3n–6	11,9	45,3
18:4n–3	20:4n–3	17,0	49,5
20:4n–6	22:4n–6	31,7	24,7	C20->C22
20:5n–3	22:5n–3	60,0	40,3
22:4n–6	24:4n–6	14,4	Nd
22:5n–3	24:5n–3	20,6	1,6
